# Supplementary material for: Unraveling the Microbiome of Necrotizing Enterocolitis: Insights in Novel Microbial and Metabolomic Biomarkers
Source: PubMed Central journal article supplement (PMC8549755; doi:10.1128/spectrum.01176-21), 2021-10-27
Supplement: spectrum01176-21_supp_2_seq10.pdf [file spectrum01176-21_supp_2_seq10.pdf]

1 **Unraveling the microbiome of necrotizing enterocolitis: insights in novel microbial and**  
2 **metabolomic biomarkers**  
3

4 Running title: Potential microbial biomarkers in necrotizing enterocolitis  
5

6 Key words: necrotizing enterocolitis, NEC, microbiota, metagenomics, shotgun  
7  
8

9 Chiara Tarracchini<sup>1§</sup>, Christian Milani<sup>1,2§</sup>, Giulia Longhi<sup>1,3</sup>, Federico Fontana<sup>1,3</sup>, Leonardo  
10 Mancabelli<sup>1</sup>, Roberta Pintus<sup>4</sup>, Gabriele Andrea Lugli<sup>1</sup>, Giulia Alessandri<sup>1</sup>, Rosaria Anzalone<sup>3</sup>,  
11 Alice Viappiani<sup>3</sup>, Francesca Turrone<sup>1,2</sup>, Michele Mussap<sup>5</sup>, Angelica Dessì<sup>4</sup>, Flaminia Cesare  
12 Marincola<sup>6</sup>, Antonio Noto<sup>7</sup>, Anna De Magistris<sup>4</sup>, Marine Vincent<sup>8</sup>, Sergio Bernasconi<sup>2</sup>, Jean-  
13 Charles Picaud<sup>8</sup>, Vassilios Fanos<sup>4,5#</sup>, Marco Ventura<sup>1,2#</sup>  
14  
15

16 § These authors contributed equally

17 # These authors contributed equally  
18

19 Laboratory of Probiogenomics, Department of Chemistry, Life Sciences, and Environmental  
20 Sustainability, University of Parma, Parma, Italy<sup>1</sup>; Microbiome Research Hub, University of  
21 Parma, Parma, Italy<sup>2</sup>; GenProbio Srl, Parma, Italy<sup>3</sup>; Neonatal Intensive Care Unit,  
22 Department of Surgical Sciences, University of Cagliari, Monserrato, Italy<sup>4</sup>; Neonatal  
23 Intensive Care Unit, AOU, Cagliari, Cagliari, Italy<sup>5</sup>; Department of Chemical and Geological  
24 Sciences, University of Cagliari, Monserrato, Cagliari, Italy<sup>6</sup>; Department of Medical Science  
25 and Public Health, University of Cagliari, Monserrato, Cagliari, Italy<sup>7</sup>; Neonatology Unit,  
26 Croix-Rousse University Hospital, Hospices Civils de Lyon, Lyon, France and and CarMen  
27 laboratory, INSERM, INRA, Claude Bernard university Lyon1, Pierre Benite, France<sup>8</sup>  
28  
29

30 # Correspondence

31 Mailing address for Marco Ventura, Department of Life Sciences, University of Parma, Parco  
32 Area delle Scienze 11a, 43124 Parma, Italy. Phone: ++39-521-905666. Fax: ++39-521-905604.  
33 E-mail: marco.ventura@unipr.it

34 Mailing address for Vassilios Fanos, Neonatal Intensive Care Unit, Department of Surgical  
35 Sciences, AOU and University of Cagliari, Monserrato, Italy, vafanos@tin.it

## 36 **Supplementary Text**

### 37 **Composition and structure of the Pre-Term Community State Types (PT-CSTs).**

38 Hierarchical Clustering Analysis (HCA) based on the species-level microbial profiling allowed  
39 the identification of five archetypal subgroups named Pre-Term Community State Types (PT-  
40 CSTs) (Table S4). In detail, PT-CST1 is composed mainly (75 %) by subjects classified as  
41 NEC. Specifically, PT-CST1 (n = 12) was characterized by a high abundance of *E. faecalis*  
42 (average of 59.44 %) with a prevalence of 100 %. Interestingly, the NEC subjects belonging to  
43 this subgroup showed higher average abundance of *Enterococcus faecalis* rather than Control  
44 samples (72.67 % vs 19.73 %, T-test *p*-value < 0.01) with concomitant presence of  
45 *Staphylococcus epidermidis* (Table S4, Figure 1b). In contrast, members of *Actinomyces*,  
46 *Corynebacterium*, *Schaalia*, and *Bifidobacterium*, which together constituted an average of  
47 about 52.19 % of the healthy microbiome, were undetected in NEC samples (Table S5, Figure  
48 2). While *St. epidermidis* commonly inhabits the human skin microbiota, in premature and very  
49 low birth weight infants this species can represent a bacterial agent causing neonatal sepsis and  
50 other neonatal morbidities, such as brain injury as well as pulmonary epithelial damage and  
51 was previously reported in NEC cases (1–4). Similarly, although *E. faecalis* was commonly  
52 found among early colonizers of the neonatal gut and, in certain circumstances, it can elicit  
53 biofilm-associated opportunistic infections, leading to clinical manifestations such as urinary  
54 tract infections, endocarditis, peritonitis, and NEC (5–8). Furthermore, acquired and natural  
55 antimicrobial resistance has been found among members of *Enterococcus* genus, likely  
56 providing *E. faecalis* with a biological advantage that allows it to defeat its niche competitors  
57 (5). Interestingly, the association of *S. epidermidis* and *E. faecalis* appeared almost absent in  
58 preterm control newborns, thus emerging as possible NEC-associated biomarkers.

59 Moving the focus on other HCL-based clusters, PT-CST2, PT-CST4, and PT-CST5 were  
60 composed of both NEC and healthy subjects and were dominated by *Escherichia coli* (PT-

61 CST2), *S. epidermidis* (PT-CST4) or *Klebsiella pneumoniae* (PT-CST5) (Table S4, Figure 1b).  
62 Nevertheless, these three species showed statistically significant difference in intra-cluster  
63 abundance between NEC and healthy subjects. In particular, the 19 NEC cases of PT-CST2  
64 showed a higher abundance of *E. coli* species (average of 86.51 %) in contrast to that found  
65 among the 14 healthy samples (67.44 %, T-test  $p$ -value < 0.05) (Table S4), accompanied by  
66 lower species richness than their healthy counterparts (average of 4 vs 7, T-test  $p$ -value < 0.05),  
67 with significantly reduction in *Bacteroides* genus members (T-test  $p$ -value < 0.05) (Table S4).  
68 In a similar fashion, the subjects with NEC of PT-CST5 exhibited a significantly higher  
69 abundance of *K. pneumoniae* compared to healthy subjects (66.54% vs 39.15 %, T-test  $p$ -value  
70 < 0.05) (Table S4) associated with a decreased biodiversity (9.6 vs 15.2 bacterial species per  
71 samples, T-test  $p$ -value < 0.05) and the lack of particular healthy infant gut-associated bacteria  
72 such as *Akkermansia* and *Bifidobacterium breve* taxa (9,10) (Table S5). Moreover, within PT-  
73 CST4 (n=18), showing *St. epidermidis* as dominant taxon with an average abundance of 78.33  
74 %, NEC samples exhibited higher relative abundance of the abovementioned species (87.95 %  
75 compared to 72.22 % of the 11 Control samples, T-test  $p$ -value < 0.05) coupled with  
76 biodiversity loss (average of 5.4 vs 7.5 species per samples in healthy infants, T-test  $p$ -value <  
77 0.05) (Table S4). Consistent with previous studies in preterm infants, these findings highlighted  
78 that although strains of *E. coli*, *K. pneumoniae*, and *St. epidermidis* were also detected in  
79 premature infants who do not develop NEC, there is a possible association between high  
80 intestinal levels of these taxa and NEC pathogenesis, specifically in a framework of  
81 biodiversity loss (11,12). In contrast, in PT-CST3 18 fecal samples from healthy subjects were  
82 combined with three NEC-affected. This subgroup was predominated by *S. agalactiae*, with an  
83 average abundance of 70.72 % and a prevalence of 66.6 % (Table S4, Figure 1b). Previous  
84 studies about *Streptococcus agalactiae* pathogenicity have reported that this microorganism  
85 can lead to neonatal infections with considerable variability in the degree of severity,

86 depending on the capsular serotype and strain-specific expression levels of other virulence  
87 factors. Thus, providing a possible explanation of the reasons, in this instance, supporting the  
88 identification of *Str. agalactiae* in the gut microbiota of healthy subjects (13,14)  
89 Overall, these findings highlighted how NEC patients often experience a marked form of  
90 dysbiosis, where uncontrolled growth of a single bacterial species occurs with concomitant  
91 severe loss of biodiversity and/or particular microorganisms. This event eventually results in a  
92 permanent loss of competition between bacterial species that, in normal condition, leads to the  
93 early-stage development process of healthy human gut microbiota (15).

94

## 95 **References**

- 96 1. Moles L, Gómez M, Moroder E, Bustos G, Melgar A, del Campo R, et al.  
97 *Staphylococcus epidermidis* in feedings and feces of preterm neonates. PLoS One  
98 [Internet]. 2020 Feb 1 [cited 2021 Apr 30];15(2). Available from:  
99 <https://pubmed.ncbi.nlm.nih.gov/32012172/>
- 100 2. Albehair MA, Alosail MA, Albulwi NM, AlAssiry A, Alzahrani FA, Bukhamsin A, et  
101 al. A Retrospective Study on the Avoidability of Ventriculoperitoneal Shunt Infections  
102 in a University Hospital in Al-Khobar, Saudi Arabia. Cureus [Internet]. 2021 Feb 4  
103 [cited 2021 Apr 30];13(2). Available from: <https://pubmed.ncbi.nlm.nih.gov/33643750/>
- 104 3. Friedrich AW. Control of hospital acquired infections and antimicrobial resistance in  
105 Europe: the way to go. Wiener Medizinische Wochenschrift [Internet]. 2019 Feb 1 [cited  
106 2021 Apr 30];169(Suppl 1):25–30. Available from:  
107 <https://pubmed.ncbi.nlm.nih.gov/30623278/>
- 108 4. Both A, Huang J, Qi M, Lausmann C, Weißelberg S, Büttner H, et al. Distinct clonal  
109 lineages and within-host diversification shape invasive staphylococcus epidermidis  
110 populations. PLoS Pathog [Internet]. 2021 Feb 5 [cited 2021 Apr 30];17(2). Available  
111 from: <https://pubmed.ncbi.nlm.nih.gov/33544760/>
- 112 5. Pathogenesis and Models of Enterococcal Infection - PubMed [Internet]. [cited 2021  
113 Apr 30]. Available from: <https://pubmed.ncbi.nlm.nih.gov/24649512/>
- 114 6. Ch'ng JH, Chong KKL, Lam LN, Wong JJ, Kline KA. Erratum to: Biofilm-associated  
115 infection by enterococci (Nature Reviews Microbiology, (2019), 17, 2, (82-94),  
116 10.1038/s41579-018-0107-z) [Internet]. Vol. 17, Nature Reviews Microbiology. Nature  
117 Publishing Group; 2019 [cited 2021 Apr 30]. p. 124. Available from:  
118 <https://pubmed.ncbi.nlm.nih.gov/30459455/>
- 119 7. Goh HMS, Yong MHA, Chong KKL, Kline KA. Model systems for the study of  
120 Enterococcal colonization and infection [Internet]. Vol. 8, Virulence. Taylor and Francis

- 121 Inc.; 2017 [cited 2021 Apr 30]. p. 1525–62. Available from:  
122 <https://pubmed.ncbi.nlm.nih.gov/28102784/>
- 123 8. Delaplain PT, Bell BA, Wang J, Isani M, Zhang E, Gayer CP, et al. Effects of artificially  
124 introduced *Enterococcus faecalis* strains in experimental necrotizing enterocolitis. *PLoS*  
125 *One* [Internet]. 2019 Nov 1 [cited 2021 Apr 30];14(11). Available from:  
126 <https://pubmed.ncbi.nlm.nih.gov/31675374/>
- 127 9. Collado MC, Derrien M, Isolauri E, De Vos WM, Salminen S. Intestinal integrity and  
128 *Akkermansia muciniphila*, a mucin-degrading member of the intestinal microbiota  
129 present in infants, adults, and the elderly. *Appl Environ Microbiol* [Internet]. 2007 Dec  
130 [cited 2021 Apr 30];73(23):7767–70. Available from:  
131 <https://pubmed.ncbi.nlm.nih.gov/17933936/>
- 132 10. Mancabelli L, Tarracchini C, Milani C, Lugli GA, Fontana F, Turrone F, et al. Multi-  
133 population cohort meta-analysis of human intestinal microbiota in early life reveals the  
134 existence of infant community state types (ICSTs). *Comput Struct Biotechnol J*  
135 [Internet]. 2020 Jan 1 [cited 2021 Apr 30];18:2480–93. Available from:  
136 <https://pubmed.ncbi.nlm.nih.gov/33005310/>
- 137 11. Patel AL, Mutlu EA, Sun Y, Koenig L, Green S, Jakubowicz A, et al. Longitudinal  
138 survey of microbiota in hospitalized preterm very-low-birth-weight infants. *J Pediatr*  
139 *Gastroenterol Nutr* [Internet]. 2016 Feb 1 [cited 2021 Apr 30];62(2):292–303. Available  
140 from: <https://pubmed.ncbi.nlm.nih.gov/26230901/>
- 141 12. Dahl C, Stigum H, Valeur J, Iszatt N, Lenters V, Peddada S, et al. Preterm infants have  
142 distinct microbiomes not explained by mode of delivery, breastfeeding duration or  
143 antibiotic exposure. *Int J Epidemiol* [Internet]. 2018 Oct 1 [cited 2021 Apr  
144 30];47(5):1658–69. Available from: <https://pubmed.ncbi.nlm.nih.gov/29688458/>
- 145 13. Manning SD, Ki M, Marrs CF, Kugeler KJ, Borchardt SM, Baker CJ, et al. The  
146 frequency of genes encoding three putative group B streptococcal virulence factors  
147 among invasive and colonizing isolates. *BMC Infect Dis* [Internet]. 2006 Jul 17 [cited  
148 2021 Apr 30];6. Available from: <https://pubmed.ncbi.nlm.nih.gov/16846499/>
- 149 14. Bobadilla FJ, Novosak MG, Cortese IJ, Delgado OD, Laczkeski ME. Prevalence,  
150 serotypes and virulence genes of *Streptococcus agalactiae* isolated from pregnant  
151 women with 35–37 weeks of gestation. *BMC Infect Dis* [Internet]. 2021 Dec 1 [cited  
152 2021 Apr 30];21(1). Available from: <https://pubmed.ncbi.nlm.nih.gov/33446117/>
- 153 15. Aujoulat F, Roudière L, Picaud JC, Jacquot A, Filleron A, Neveu D, et al. Temporal  
154 dynamics of the very premature infant gut dominant microbiota. *BMC Microbiol*  
155 [Internet]. 2014 [cited 2021 Apr 30];14(1). Available from:  
156 <https://pubmed.ncbi.nlm.nih.gov/25551282/>

157

158

159

160

161

162

163 **Supplementary Figure Legends**

164 **Figure S1. Exploration of the diversity and the gut microbiota composition of the pre-**  
165 **term infant.** Panel a shows the box and whisker plot of the species richness observed in  
166 healthy, pre-NEC, and NEC infants. Panel b reports the principal coordinate analysis (PCoA)  
167 of the 171 collected pre-term infant samples.

a)

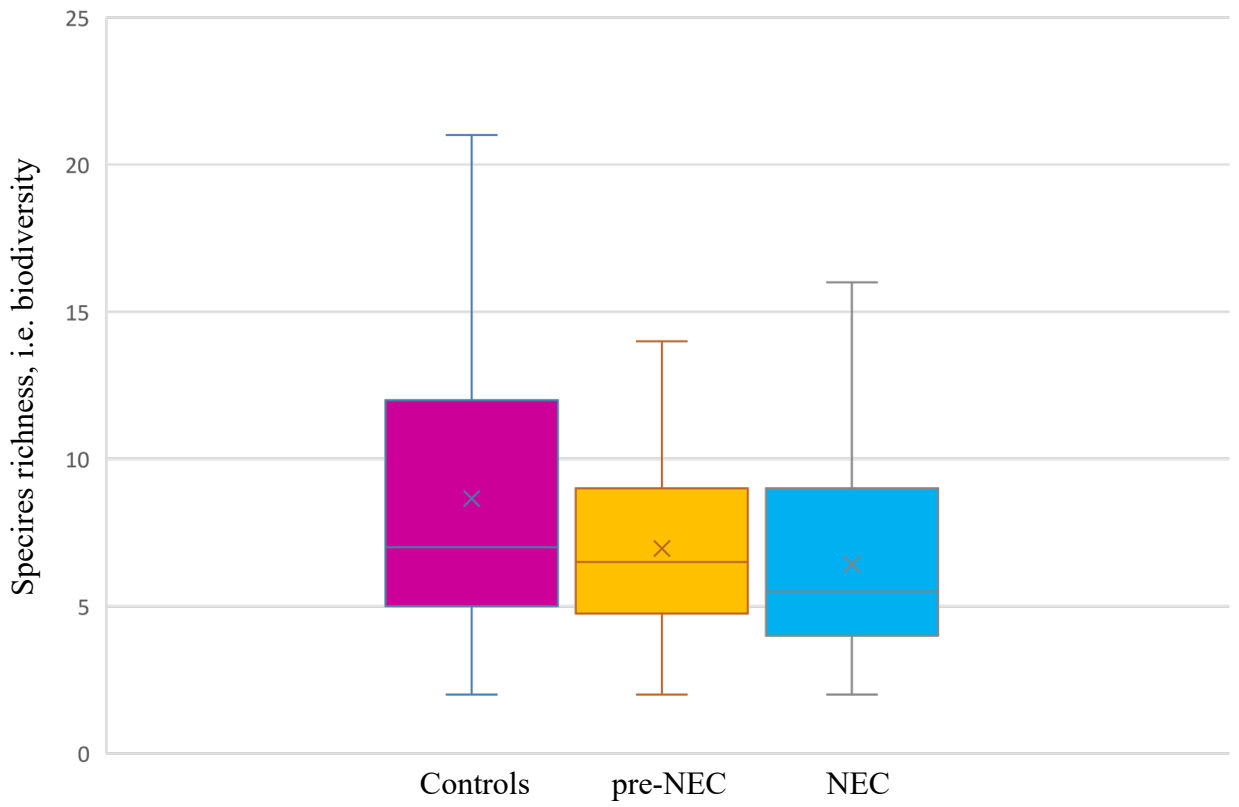

b)

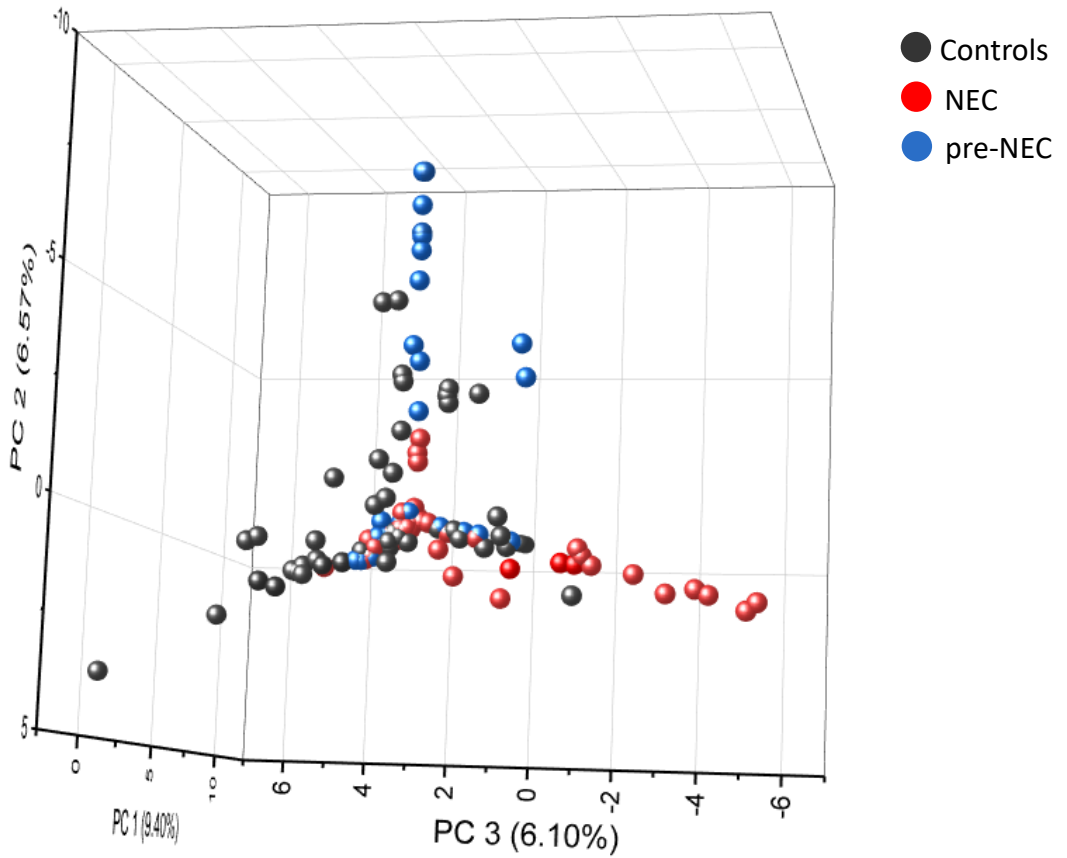

Figure S1
